# Supplementary material
Source: PubMed Central journal article supplement (PMC4158619)
Supplement: NIHMS594437-supplement-Supplementary_Data.pdf [file NIHMS594437-supplement-Supplementary_Data.pdf]

| <b>Supplementary Table 1:</b>     |               |            |                |
|-----------------------------------|---------------|------------|----------------|
| Tukey's Multiple Comparisons Test |               |            |                |
| Adjusted P value                  |               |            |                |
|                                   | Bacteroidetes | Firmicutes | Proteobacteria |
| Healthy vs. UC                    | 0.563         | 0.897      | 0.639          |
| Healthy vs. CD                    | 0.032         | 0.221      | 0.953          |
| CD vs. UC                         | 0.270         | 0.423      | 0.830          |

| <b>Supplemental Table 2:</b><br>Patient characteristics | <b>UC</b><br><b>n = 14</b> | <b>CD</b><br><b>n = 13</b> | <b>VA</b><br><b>n = 27</b> |
|---------------------------------------------------------|----------------------------|----------------------------|----------------------------|
| Age, y                                                  |                            |                            |                            |
| Mean (SD)                                               | 41 ± 11                    | 38 ± 11                    | 61 ± 7                     |
| Sex, n (%)                                              |                            |                            |                            |
| Male                                                    | 9 (64)                     | 11 (84.6)                  | 26 (96.3)                  |
| Female                                                  | 5 (36)                     | 2 (15.4)                   | 1 (2.7)                    |
| BMI (kg/m <sup>2</sup> )                                | 25.3 ± 3.9                 | 24.1 ± 4.4                 | 29.2 ± 5.9                 |
| Ethnicity, n (%)                                        |                            |                            |                            |
| Caucasian                                               | 12 (85.7)                  | 11 (84.6)                  | 8 (29.6)                   |
| Hispanic                                                | 2 (14.3)                   | --                         | 8 (29.6)                   |
| African American                                        | --                         | --                         | 8 (29.6)                   |
| East Asian                                              | --                         | 1 (7.7)                    | --                         |
| other                                                   | 1 (7.1)                    | 1 (7.7)                    | 3 (11.1)                   |
| Disease time, y                                         | 15.6 ± 9.2                 | 15.8 ± 11.1                |                            |
| Active Meds, n (%)                                      |                            |                            |                            |
| Azathioprine                                            | 2 (14.3)                   | 1 (7.7)                    |                            |
| 6-MP                                                    | 5 (36.0)                   | 4 (30.8)                   |                            |
| Anti-TNF                                                | 2 (14.3)                   | 4 (30.8)                   |                            |
| Mesalamine (5-ASA)                                      | 11 (78.6)                  | 4 (30.8)                   |                            |
| Corticosteroids                                         |                            | 3 (23.1)                   |                            |
| Involvement n (%)                                       |                            |                            |                            |
| Colon                                                   |                            | 11 (84.6)                  |                            |
| Small Bowel                                             |                            | 7 (53.8)                   |                            |
| Perianal                                                |                            | 4 (30.8)                   |                            |
| Both small and colon                                    |                            | 7 (53.8)                   |                            |

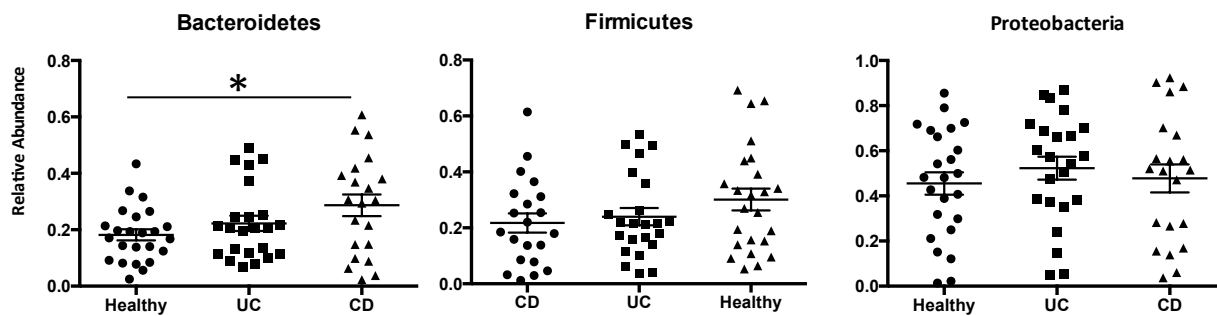

Figure S1: Taxonomic differences at the phylum level of the mucosal microbiota in IBD and healthy patients. Scatterplots showing the relative abundance of the 3 most prevalent bacterial phyla of Bacteroidetes, Firmicutes, and Proteobacteria. Samples from CD patients had a significantly higher proportion of Bacteroidetes compared with healthy control subjects. Although UC and CD biopsies showed slightly decreased abundance of Firmicutes and slightly increased abundance of Proteobacteria, these differences were not statistically significant.

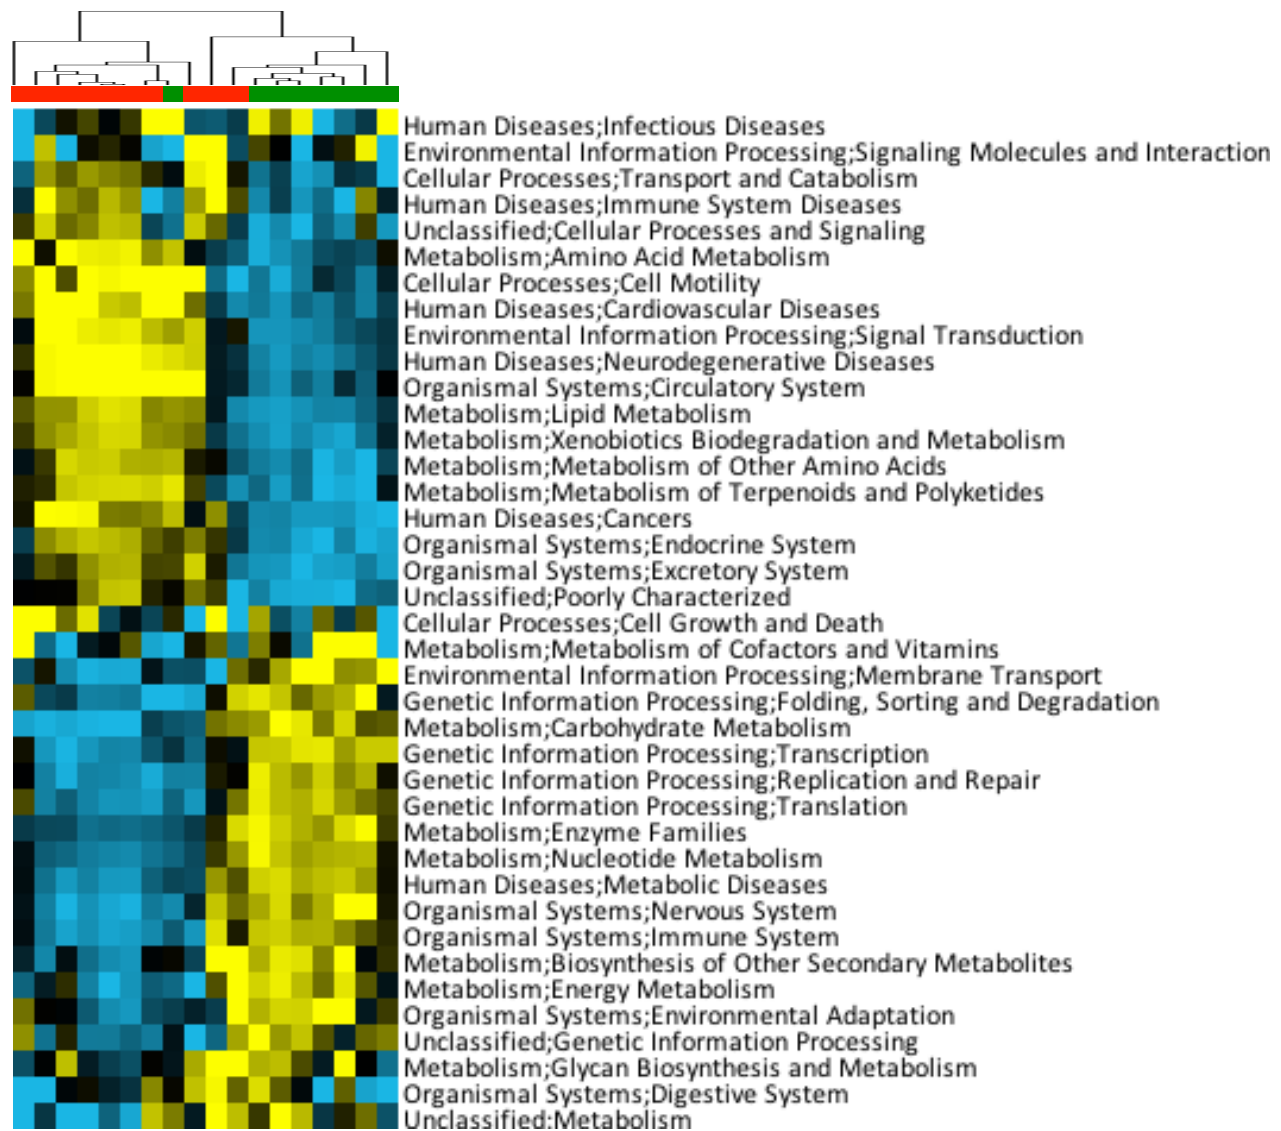

Figure S2: Unsupervised hierarchical clustering analysis on the relative abundance values of KEGG pathways represented from the mucosal microbiota of UC patients. Red = Inflamed. Green = Non-inflamed

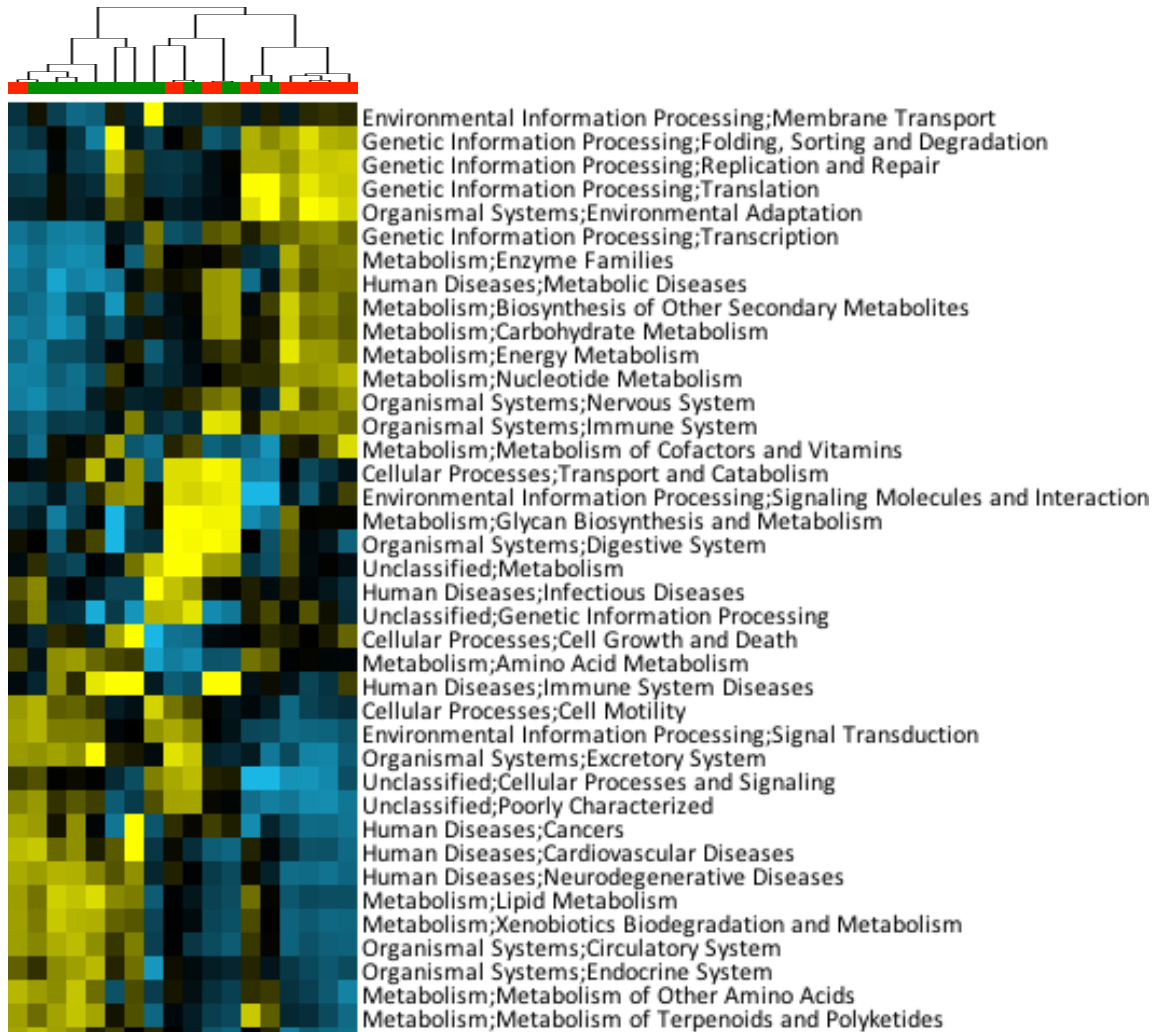

Figure S3: Unsupervised hierarchical clustering analysis on the relative abundance values of KEGG pathways represented from the mucosal microbiota of CD patients. Red = Inflamed. Green = Non-inflamed

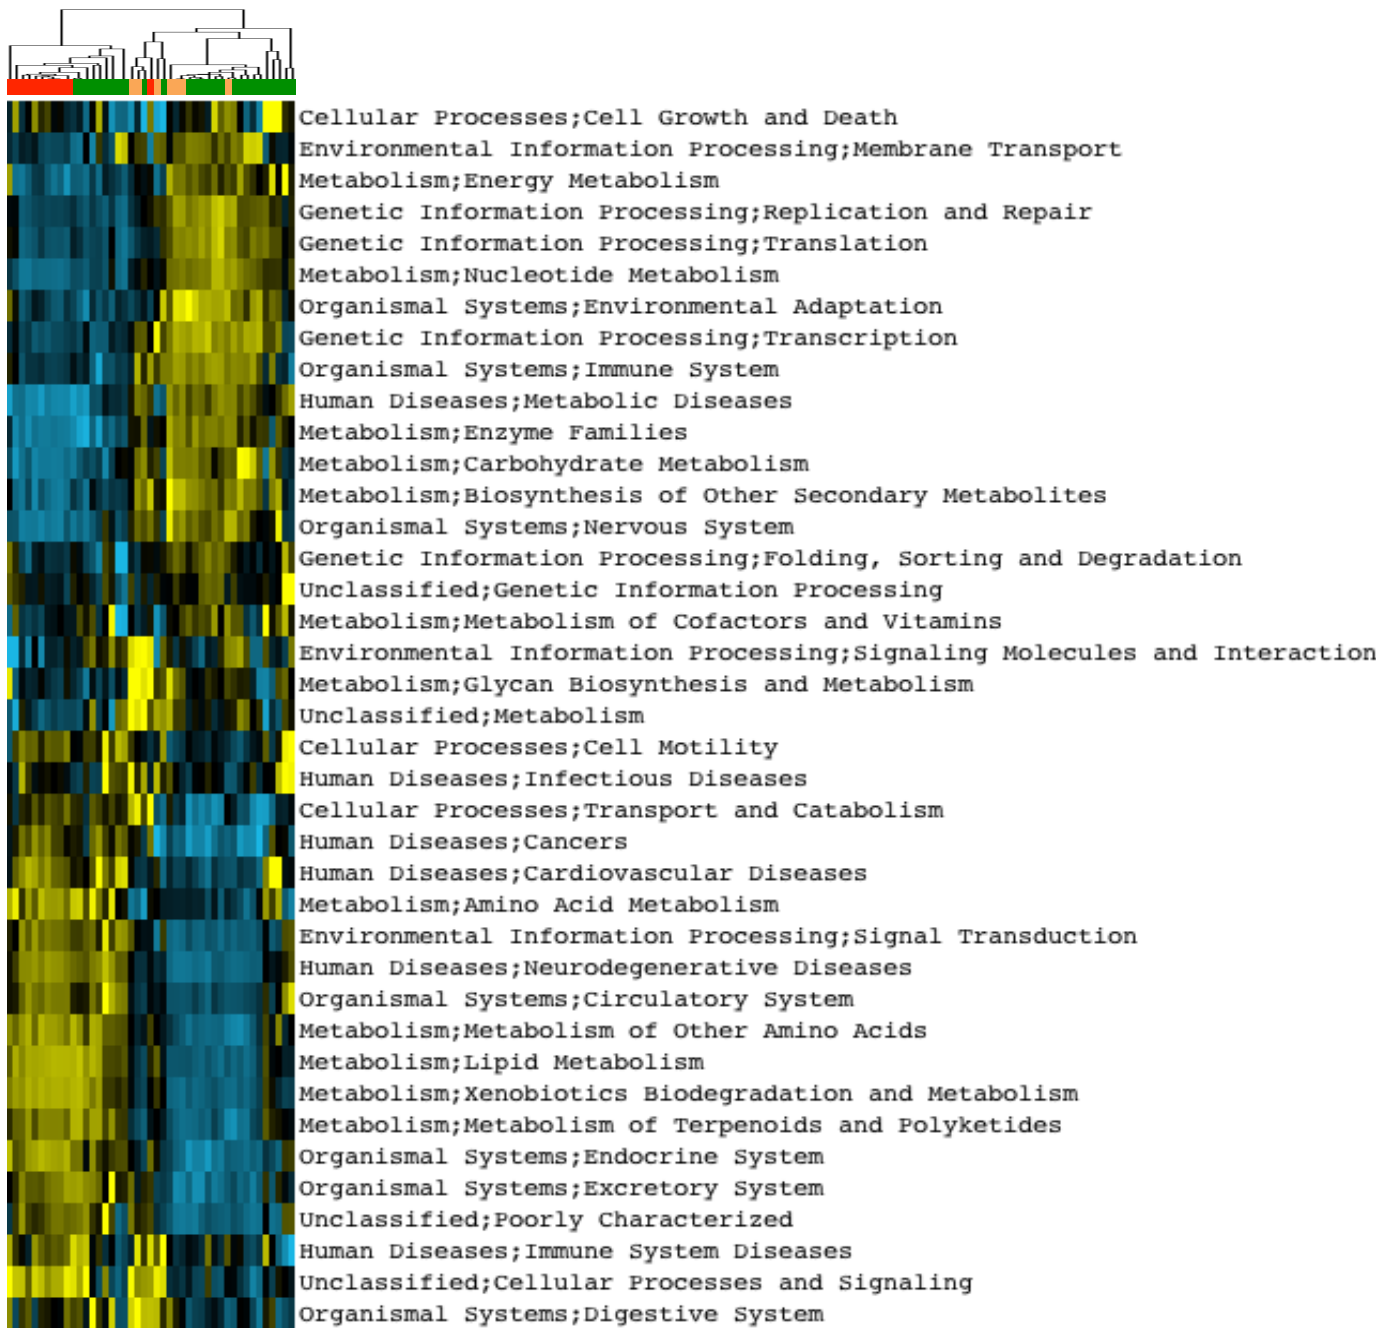

Figure S4: Unsupervised hierarchical clustering analysis on the relative abundance values of KEGG pathways represented from the inflamed mucosal microbiota of UC and CD patients, as well as healthy controls. Red = Inflamed UC. Orange = Inflamed CD. Green = Healthy Subjects.
